# Supplementary material for: Genome‑wide Characterization of the cotton FAR gene family reveals a positive role of GhFAR3 in Verticillium dahliae resistance
Source: Research Square preprint supplement (doi:10.21203/rs.3.rs-5718880/v1), 2025-01-02
Supplement: Supplementary file 1 [file a850ed26ea9618b4b48cc6f7.xlsx]

## Sheet: Table S1
Table S1. Physical and chemical characteristics of G. arboreum, G. raimondi , G. hirsutum and G. barbadense FAR genes.
Gene ID	Gene Name	CDS Length（bp）	Protein Length (aa)	MW（KDa）	Pi	Subcellular Location
GrFAR1	Gorai.001G121200	1476	491	55.829	8.497	Chloroplast. Golgi apparatus.
GrFAR2	Gorai.004G009200	1476	491	55.401	8.925	Golgi apparatus.
GrFAR3	Gorai.006G109600	1302	433	49.731	8.328	Chloroplast.
GrFAR4	Gorai.006G111100	1470	489	56.02	8.495	Chloroplast. Golgi apparatus.
GrFAR5	Gorai.006G144700	1818	605	67.098	8.154	Golgi apparatus
GrFAR6	Gorai.N013400.1	1113	370	42.573	9.309	Chloroplast.
GhFAR1	GH_A07G1194	1476	491	55.739	9.163	Golgi apparatus
GhFAR2	GH_D07G1174	1476	491	55.8	7.989	Chloroplast Golgi apparatus
GhFAR3	GH_A08G0083	1476	491	55.556	9.103	Golgi apparatus
GhFAR4	GH_D08G0087	1476	491	55.474	8.926	Golgi apparatus
GhFAR5	GH_A09G1109	1266	421	48.181	9.888	Golgi apparatus
GhFAR6	GH_D09G1075	1440	479	54.931	8.668	Chloroplast
GhFAR7	GH_A09G1456	1818	605	67.005	8.279	Mitochondrion
GhFAR8	GH_D09G1410	1827	608s	67.369	8.237	Mitochondrion
GhFAR9	GH_D09G1060	618	205	23.182	8.194	Golgi apparatus
GhFAR10	GH_D09G1061	726	241	27.846	9.232	Golgi apparatus
GbFAR1	GB_A07G1177	1476	491	55.753	9.163	Golgi apparatus.
GbFAR2	GB_D07G1175	1476	491	55.814	7.989	Chloroplast. Golgi apparatus.
GbFAR3	GB_A08G0079	1476	491	55.556	9.103	Golgi apparatus.
GbFAR4	GB_D08G0079	1476	491	55.488	9.057	Chloroplast. Golgi apparatus.
GbFAR5	GB_A09G1240	1458	485	55.807	8.77	Golgi apparatus.
GbFAR6	GB_D09G1084	1470	489	55.925	8.967	Golgi apparatus.
GbFAR7	GB_A09G1227	1266	421	48.149	9.855	Golgi apparatus.
GbFAR8	GB_D09G1068	1506	501	57.525	9.34	Chloroplast.
GbFAR9	GB_A09G1578	1818	605	66.939	8.28	Mitochondrion.
GbFAR10	GB_D09G1419	2103	700	77.888	8.444	Chloroplast. Golgi apparatus. Mitochondrion.
GaFAR1	Ga07G1182	1476	491	55.754	9.029	Golgi apparatus.
GaFAR2	Ga08G0098	1494	497	56.327	9.071	Golgi apparatus.
GaFAR3	Ga09G1100	1530	509	58.743	8.777	Chloroplast. Golgi apparatus.
GaFAR4	Ga09G1483	1818	605	66.939	8.28	Mitochondrion.
GaFAR5	Ga14G2584	1458	485	55.894	8.993	Chloroplast. Golgi apparatus.

## Sheet: Table S2
Table S2. The protein sequence of FAR gene in Arabidopsis thaliana, G.hirsutum, G.barbadense, G.arboreum, G.raimonaii amd Oryza sativa
Gene namme	Gene ID	Protein sequence
Gorai.001G121200	GrFAR1	MELGSALQFLDNKSILVTGGTGFLAKIFVEKILRVQPNVKKLYLLVRAADHKSAIHRLHHEIVGKDLFRNLKEKCGVNFS SFISQKITVIPGDLTHQDLGLHDSDLLQLLCKELDVLLNLAATTNFDERYDVALDLNTLGAKYVVDFAKKCAKLQVLVHV STAYVSGERSGLIVENSYRMGETLNGVTGLDVNIEKQVVEDQLHLLRLQGASDKDITIAMKDLGIQRARLYGWPNTYVFT KAMGEMMVGELKDIIPAVIIRPTIITSTYKEPFPGWVEGIRTIDSLAVGYAKGKLTFFLGDLEAIVDVIPADMVVNAIIV AMIAEARHQQPQTIYQVGSSIRNPLRYSNLQDYGFRYFTKNPWINKDGKPVIVSKVTVMNSMDSFQRYMAFRYLL…
Gorai.004G009200	GrFAR2	MELGSALHFLDSKSILVTGAAGFLAKIFVEKILRVQPNVKKFYLLLRAADHKSAIHRLHNEIIGKDLFKVLKEKCGKNFS SFISEKITLIPGDISHEDLGVKDCNLVQEMLNEVDVVVNLAATTNFDERYDVALGLNTFGAKFVANFAKKCVKLKVLVHV STAYVSGEKTGLILENSYSMGETLNGVSGLDINFEKNVIEQKLNELRLLGASDKDITQAMKDLGIQRARFYGWPNTYVFT KAMGEMLVGEFKANMATIILRPTIITSTFKEPFPGWAEGVRTIDSLAMGYAKGKLTFFLGDVDSVVDLIPADMVVNAIIV AMVAHASNQPSETIYQVGSSMRNPVKYLSLQDFGYRYFSKKPWINKDGKAVIVGKIRVMDSMASFHRYMALRYLL…
Gorai.006G109600	GrFAR3	MPTREMKEMIRENDEHQNQDMELDNVAKFLQGKTILVTGATGFLAKVFIEKILRLQLNVNKLYLLLRTSNDKFATQRLED EIISTELFRILRDKWGSKFDALISTFLTFGRYDIALGINTFGAFNVLNFGKKCDKIKLFLHISTAYVCGEKAGIILEKRF YMGETLKGTHSINIFEEKITMEQQLAQLQYHGAPDKAITSSMKEFGLERAKLNGWPNTYVFTKAMGEMLLGQFKGDLPLV IIRPTMIASTYKQPFPGWIEGVRTFDSFIVNYGKGKLTCFPANPNTIIDVIPVDMVVNAMVVAMKVHYAERHVCETIYHV SSSFRNPLTLSDLRNLFHCTLCRRIYFVANVSKKIYKNLNRKINLAIQLAKLYEPYTFFLGSFNDGNLVELQRVA…
Gorai.006G111100	GrFAR4	MELDNAVKFLQGKTILITGATGFLAKVFVEKILRLQPNVNKLYLLVRASNNKSATQRLYDEIISTELFKILRNNWGSKFD ALISSRVKAVAGDISFENLGLNDSELREEMRKKIQIIVNVAASTDFGERYDDALGINTFGALNVLNFGKKCDEVKLFLHI STAYVCGEETGIILEKGENLKRRNDINIFEEKRLAEEQLSQLQNQCIPDKAITSSMKEFGLERAKMNGWPNTYVFTKAMG EMLLEKFKGDLPLVIIRPTIIASTYKQPFPGWIEGVRTMDVVLVNYGKGKLTCFPGNLNSALDVIPVDMVVNAMVVAMEV HYAQHQYSCETIYHVGTSSKNPLKLSDLRNLVHYYFTKNPWIDTNGQKVEVGKLIVVSTINRFFLYMKIKYVLPL…
Gorai.006G144700	GrFAR5	MGALFLNCFSVSPTAFNKGGSWRKKRSNCSSFVHCQGSSGKAIKTAGVSSVVKERSKMVNGGDRSPALMDAGSLIVSPNQ ADIAVKDLVPYGGSTTSLVELQDGIGIVKFLRGKEFFITGSTGFLAKVLIEKILRTVPDVGKIFVLVKAKSKEAAMERLK TEIINAELFNCLQQTYGNSYQSFMLSKLVPVVGNVCESDLGLDDELADLISKEVDIIVNSAANTTFDERYDVAIDINTKG ASHLMGFAKKCKKLKLFLQVSTAYVNGQRQGRVMEKPFDIGDCIARENLIAETTPRSIPELDIEEEFVLARDTKEGCHES ELAQKMKELGLQRARKYGWQDTYVFTKAMGEMMINNMRGEIPVVIIRPSVIESTCKEPFPGWMEGNRMMDPIVLC…
Gorai.N013400.1	GrFAR6	MSQIYQFVFFFILAFLTFGRYDIALGINTFGAFNVLNFGKKCDKIKLFLHISTAYVCGEKAGIILEKRFYMGETLKGTHS INIFEEKRTMEEQLAQLRCHGAPDKAIKSSMKEFGLKRAMGEMLLGQFKGDLPLVIIRPTAIASTYKQPFPGWIEGVRTF DSFIVSYGKGKLTCFPANPNTIVDVIPVDMVVNAMVVAMRVHYAERHVCETIYHVSSSFRNPLTLSDLRNLFHCYFIKNP WIDANGLRVKVGQLTFFSKANRYLLLMQMKYVLPLKVLYLANILCCQRFKKIYKNLNRKINFAIQLAKLYEPYAFFLGSF NDGNLVELQRVAEEQGIDLVEFNFDSESIEWEEYMMNIHIPGLLKYGIKS
GH_A07G1194	GhFAR1	MELGSALQFLDNKSILVTGGTGFLAKIFVEKILRVQPNVKKLYLLVRAAD HKSAIHRLHHEIVGKDLFRNLKKKCGTNFSSFISQKITVIPGDLTHQDLG LHDSDLLQLLCKELDVLLNLAATTNFDERYDVALGLNTLGAKYVVDFAKK CAKLQVLVHVSTAYVSGERSGLIVENSYRMGETLNGVSGLDVNIEKQVVE DQLHLLRLQGASDKDITVAMKDLGIQRARRYGWPNTYVFTKAMGEMMVGE LKDIIPAVIIRPTIVTSTYKEPFPGWVEGIRTIDSLAVGYAKGKLTFFLG DLEAIVDVIPADMVVNAIIVAMIAEARHQQPQTIYQVGSSIRNPLRYSNL QDYGFRYFTKNPWINKDGKPVIVSKVTVMNSMDSFQRYMAFR…
GH_D07G1174	GhFAR2	MELGSALQFLDNKSILVTGGTGFLAKIFVEKILRVQPNVKKLYLLVRAAD HKSAIHRLHHEIVGKDLFRNLKEKCGINFSSFIAQKITVIPGDLTHQDLG LHDSDLLQLLCKELDVLLNLAATTNFDERYDVALDLNTLGAKYVVDFAKK CAKLQVLVHVSTAYVSGERSGLIVENSYRMGETLNGVTGLDVNIEKQVVE DQLHLLRLQGASDKDVTIAMKDLGIQRARLYGWPNTYVFTKAMGEMMVGE LKDIIPAVIIRPTIITSTYKEPFPGWVEGIRTIDSLAVGYAKGKLTFFLG DLEAIVDVIPADMVVNGIIVAMIAEARHQQPQTIYQVGSSIRNPLRYSNL QDYGFRYFTKNPWINKDGKPVIVSKVTVMNSMDSFQRYMAFR…
GH_A08G0083	GhFAR3	MELGSALHFLDNKSILVTGAAGFLAKIFVEKILRVQPNVKKFYLLLRAAD HKSAIHRLHNEIIGKDLFKVLKEKCGKNFSLFISEKITLIPGDISHEDLG IKDCTLVQEMLNEVDVVVNLAATTNFDERYDVALGLNTFGAKFVANFAKK CVKLKVLVHVSTAYVSGEKTGLILENSYRMGETLNGVSGLDINFEKKIIE QKLNELRLLGASDKDITQAMKDLGIQRARFYGWPNTYVFTKAMGEMLVGE FKANMATIILRPTIITSTFKEPFPGWAEGVRTIDSLAIGYAKGKLTFFLG DVDSVVDLIPADMVVNAIIIAMVAHASNQPSETIYQVGSSMRNPVKYHNL QDFGYRYFSKKPWINKDGKAVIVGKIRVMDSMASFHRYMALR…
GH_D08G0087	GhFAR4	MELGSALHFLDSKSILVTGAAGFLAKIFVEKILRVQPNVKKFYLLLRAAD HKSAIHRFHNEIIGKDLFKVLKEKCGKNFSSFISEKITLIPGDISHEDLG IKDCNLVQEMLNEVDVVVNLAATTNFDERYDVALGLNTFGAKFVANFAKK CVKLKVLVHVSTAYVSGEKTGLILENSYSMGETLNGVSGLDINFEKNVIE QKLNELRLLGASDKDITQAMKDLGIQRARFYGWPNTYVFTKAMGEMLVGE FKANMATIILRPTIITSTFKEPFPGWAEGVRTIDSLAMGYAKGKLTFFLG DVDSVVDLIPADMVVNAIIVAMVAHASNQPSETIYQVGSSMRNPVKYHSL QDFGYRYFSKKPWINKDGKAVIVGKIRVMDSMASFHRYMALR…
GH_A09G1109	GhFAR5	MDLDNVTKFLQGKTILVTGATGFLAKVFIEKILRLQLNVNKLYLLLRTSN DKFATQRLKDEIISTELFKILRDKWGSKFDALISSKVIAVEGDISSENLG LEDSKLREELRKEIEIVVNSAATTSFNERYNVALGINTFGAFNVLNFGKK CDKIKLFLHISTAYVCGEKADMILEKRFYMGETLKGTHSINIFEEKRTME EQLAQLQYHGAPDKAIKSSMKEFGLERAKLNGWPNTYVFTKAMGEMLLGH FKGDLPLVIIRPTMIASTYKQPFPGWIEGVRTFDSFIVSYGKGKLTCFPA NPNTIIDVIPVDMVVNAMVVAMKVHYAERQHACETIYHVSSSFRNPLTLS DLRNLFHCYFIRNPWIDANGLRVKVGQLTFFSKVNRFLLLMQ…
GH_D09G1075	GhFAR6	MVNRRELAEGVPSIITVFVEKILRLQPNVNKLYLLVRASNNKSATQRLYD EIISTELFKILRNNWGSKFDDLISSRVKAVAGDISFENLGLNDSELREEM LKKIQIIVNVAASTNFGERYDDALGINTFGALNVLNFGKKCDEVKLFLHI STAYVGGEETGIILEKGENLKRRNDINIFEEKRLAEELLSQLQNQCIPDK AITSSMKEFGLERAKMNGWPNTYVFTKAMGEMLLGKFKGDLPLVIIRPTI IASTYKQPFPGWIEGVRTMDVVLVNYGKGKLTCFPGNLNSALDVIPVDMV VNAMVVAMEVHYAQHQYSCETIYHVGTSSKNPLKLSDLRNLVHYYFTKNP WIDTNGQKVEVGKLIVVSTINRFFLYMKIKYVLPLKVFYLIN…
GH_A09G1456	GhFAR7	MGALFLNCFSVPPTAFNKGGSGRKKRSNCSSFVHCQGSGGKAIKTAGVYS VVKERSKMVNGGDRSAALMDAGSLIVSPNQADIAVKDLVPYGGSTTSLVE LQDGIGIVKFLRGKEFFITGSTGFLAKVLIEKILRTVPDVGKIFVLVKAK SKEAAMERLKTEIINAELFNCLQQTYGNSYQSFMLSKLVPVVGNVCESDL GLDDELANLISKEVDIIVNSAANTTFDERYDVAMDINTKGASHLMGFAKK CKKLKLFLQVSTAYVNGQRQGRVMEKPFDIGDCIARENLIAETTPRSIPE LDIEEEFGLARDTKEGCHERELAQKMKELGLQRARKYGWQDTYVFTKAMG EMMINNMRGEIPVVIIRPSVIESTCKEPFPGWMEGNRMMDPI…
GH_D09G1410	GhFAR8	MGALFLNCFSVSPTAFNKGGSWRKKRSNCSSFVHCQGSSGKAIKTAGVSS VVKERSKMVNGGDRSAALMDAGGLIVSPNQADIAVKDLVPYGGSTTSLVE LQDGIGIVKFLRGKEFFITGSTGFLAKVLIEKILRTVPDVGKIFVLVKAK SKEAAMERLKTEIINAELFNCLQQTYGNSYQSFMLSKLVPVVGNVCESDL GLDDELADLISKEVDIIVNSAANTTFDERYDVAIDINTKGASHLMGFAKK CKKLKLFLQQNITCAAYVNGQRQGRVMEKPFDIGDCIARENLIAETTPRS IPELDIEEEFVLARDTKEGCHESELAQKMKELGLQRARKYGWQDTYVFTK AMGEMMINNMRGEIPVVIIRPSVIESTCKEPFPGWMEGNRMM…
GH_D09G1060	GhFAR9	MKEMIRENDECQNQDMELDNVAKFLQGKTILVTGATGFLAKVFIEKILRL QLNVNKLYLLLRTSNDKFATQRLENEITSTELFRILRDKWGSKFDALISS KVVAVEGDISSENLGLEDSKLREEMRKEIEIVVNSAATTCFNERYDVALG INTFGAFNVLNFGKKCDKIKLFLHISTAYVCGEKAGKKNAEISSIIRPIS ICMIK
GH_D09G1061	GhFAR10	MGLPLVIIRPTMIASTYKQAFPGWIEGVRTFDSFIVSYGKGKLTCFPANP NTIIDVIPVDMVVNAMVVAMKVHYAERHVCETIYHVSSSFRNPLTLSDLR NLFHCYFIKNPWIDANGLRVKIGQLTFFSKANRYLLLMQMKYVLPLKVLY LANILCCQRFKKIYKNLNRKINFAIQLAKLYEPYTFFLGSFNDGNLVELQ RVAEEQGIDLVEFNFDSESIEWEAYMMNIHIPGLLKYGIKS
GB_A07G1177	GbFAR1	MELGSALQFLDNKSILVTGGTGFLAKIFVEKILRVQPNVKKLYLLVRAAD HKSAIHRLHHEIVGKDLFRNLKKKCGTNFSSFISQKITVIPGDLTHQDLG LHDSDLLQLLCKELDVLLNLAATTNFDERYDVALGLNTLGAKYVVDFAKK CAKLQVLVHVSTAYVSGERSGLIVENSYRMGETLNGVSGLDVNIEKQVVE DQLHLLRLQGASDKDITIAMKDLGIQRARRYGWPNTYVFTKAMGEMMVGE LKDIIPAVIIRPTIVTSTYKEPFPGWVEGIRTIDSLAVGYAKGKLTFFLG DLEAIVDVIPADMVVNAIIVAMIAEARHQQPQTIYQVGSSIRNPLRYSNL QDYGFRYFTKNPWINKDGKPVIVSKVTVMNSMDSFQRYMAFR…
GB_D07G1175	GbFAR2	MELGSALQFLDNKSILVTGGTGFLAKIFVEKILRVQPNVKKLYLLVRAAD HKSAIHRLHHEIVGKDLFRNLKEKCGINFSSFIAQKITVIPGDLTHQDLG LHDSDLLQLLCKELDVLLNLAATTNFDERYDVALDLNTLGAKYVVDFAKK CAKLQVLVHVSTAYVSGERSGLIVENSYRMGETLNGVTGLDVNIEKQVVE DQLHLLRLQGASDKDVTIAMKDLGIQRARLYGWPNTYVFTKAMGEMMVGE LKDIIPAVIIRPTIITSTYKEPFPGWVEGIRTIDSLAVGYAKGKLTFFLG DLEAIVDVIPADMVVNAIIVAMIAEARHQQPQTIYQVGSSIRNPLRYSNL QDYGFRYFTKNPWINKDGKPVIVSKVTVMNSMDSFQRYMAFR…
GB_A08G0079	GbFAR3	MELGSALHFLDNKSILVTGAAGFLAKIFVEKILRVQPNVKKFYLLLRAAD HKSAIHRLHNEIIGKDLFKVLKEKCGKNFSLFISEKITLIPGDISHEDLG IKDCTLVQEMLNEVDVVVNLAATTNFDERYDVALGLNTFGAKFVANFAKK CVKLKVLVHVSTAYVSGEKTGLILENSYRMGETLNGVSGLDINFEKKIIE QKLNELRLLGASDKDITQAMKDLGIQRARFYGWPNTYVFTKAMGEMLVGE FKANMATIILRPTIITSTFKEPFPGWAEGVRTIDSLAIGYAKGKLTFFLG DVDSVVDLIPADMVVNAIIIAMVAHASNQPSETIYQVGSSMRNPVKYHNL QDFGYRYFSKKPWINKDGKAVIVGKIRVMDSMASFHRYMALR…
GB_D08G0079	GbFAR4	MELGSALHFLDSKSILVTGAAGFLAKIFVEKILRVQPNVKKFYLLLRAAD HKSAIHRLHNEIIGKDLFKVLKEKCGKNFSSFISEKITLIPGDISHEDLG IKDCNLVQEMLNEVDVVVNLAATTNFYERYDVALGLNTFGAKFVANFAKK CVKLKVLVHVSTAYVSGEKTGLILENSYSMGETLNGVSGLDINFEKNVIE QKLNELRLLGASDKDITQAMKDLGIQRARFYGWPNTYVFTKAMGEMLVGE FKANMATIILRPTIITSTFKEPFPGWAEGVRTIDSLAMGYAKGKLTFFLG DVDSVVDLIPADMVVNAIIVAMVAHASNQPSETIYQVGSSMRNPVKYHSL QDFGYRYFSKKPWINKDGKAVIVGKIRVMDSMASFHRYMALR…
GB_A09G1240	GbFAR5	MELDNAVKFFQGKTILITGATGFLAKVFVEKILRIQPNVNKLYLLVRASN NKSAKQRLYDEIISKELFKILCNNWGSKFDALISNKVKAVAGDISFENLG LNDSELREEMQKEIQIIVNVAASTDFSERYDDALDINTFGAFNVLNFGKK CDKVKLFLHISTAYVCGEEIGIILEKLKRRNDMNIFEEKRLAEEQLSQLQ NQCIPDKAITSSMKEFGLERAKLNGWPNTYVFTKAMGEMLLERFKGDLPL VIIRPTIIASTYKQPFPGWIEGVRTIDSVLVNYGKGKLTCFPGNLNSALD VIPVDMVVNVMVVAIEVHYAQHQYSCETIYHVGTSSKNPLKLSDLRNLSH YYFTKNPWIDTNGQKVEAGKLIVFSTINRFFLYMKIKYVLPL…
GB_D09G1084	GbFAR6	MELNNAVKFLQGKTILITGATGFLAKVFVEKILRLQPNVNKLYLLVRASN NKSATQRLYDEIISTELFKILRNNWGSKFDDLISSRVKAVAGDISFENLG LNDSELREEMLKKIQIIVNVAASTNFGERYDDALGINTFGALNVLNFGKK CDEVKLFLHISTAYVGGEETGIILEKGENLKRRNDINIFEEKRLAEELLS QLQNQCIPDKAITSSMKEFGLERAKMNGWPNTYVFTKAMGEMLLGKFKGD LPLVIIRPTIIASTYKQPFPGWIEGVRTMDVVLVNYGKGKLTCFPGNLNS ALDVIPVDMVVNAMVVAMEVHYAQHQYSCETIYHVGTSSKNPLKLSDLRN LVHYYFTKNPWIDTNGQKVEVGKLIVVSTINRFFLYMKIKYV…
GB_A09G1227	GbFAR7	MDLDNVTKFLQGKTILVTGATGFLAKVFIEKILRLQLNVNKLHLLLRTSN DKFATQRLKDEIISTELFRILRDKWGSKFDALISSKVIAVEGDISSENLG LEDSKLREELRKEIEIVVNSAATTSFNERYDVALGINTFGAFNVLNFGKK CDKIKLFLHISTAYVCGEKADMILEKRFYMGETLKGTHSINIFEEKRTME EQLAQLQYHGAPDKAIKSSMKEFGLERAKLNGWPNTYVFTKAMGEMLLGH FKGDLPLVIIRPTMIASTYKQPFPGWIEGVRTFDSFIVSYGKGKLTCFPA NPNTIIDVIPVDMVVNAMVVAMKVHYAERQHACETIYHVSSSFRNPLTLS DLRNLFHCYFIRNPWIDANGLRVKVGQLTFFSKVNRFLLLMQ…
GB_D09G1068	GbFAR8	MELDNVAKFLQGKTILVPGATGFLAKVFIEKILRLQLNVNKLYLLLSTSN DKFVTQRLENEVYKKIISIFITELFRILRDKWGSKFDALISSKVIAVEGD ISSENLGLEDSKRREEMRKEIEIVVNSAATTCFNERYDVALGINTFGAFN VLNFGKKCDKIKLFLHISTAYVCGEKAGIILEKRFYMGEILKGTHSINIF EEKRTMEEQLAQLRCHGAPDKAIKSSMKEFGLKRAKLNGWPNTYVFTKAM REMLLGQFKGDLPLVIIRPTAIASTYKQPFPGWIEGVRTFDSFIVSYGKG KLTCFPANPNTIIDVIPVDMVVNAMVVAVKVHYAERQHACETIYHVSSSF RNPLTLSDLRNLSHCYFIKNPWIDANGLRVKVGQLTFFSKAN…
GB_A09G1578	GbFAR9	MGALFLNCFSVPPTAFNKGGSGRKKRSNCSSFVHCQGSGGKAIKTAGVSS VVKERSKMVNGGDRSAALMDAGSLIVSPNQADIAVKDLVPYGGSTTSLVE LQDGIGIVKFLRGKEFFITGSTGFLAKVLIEKILRTVPDVGKIFVLVKAK SKEAAMERLKTEIINAELFNCLQQTYGNSYQSFMLSKLVPVVGNVCESDL GLDDELANLISKEVDIIVNSAANTTFDERYDVAMDINTKGASHLMGFAKK CKKLKLFLQVSTAYVNGQRQGRVMEKPFDIGDCIARENLIAETTPRSIPE LDIEEEFGLARDTKEGCHERELAQKMKELGLQRARKYGWQDTYVFTKAMG EMMINNMRGEIPVVIIRPSVIESTCKEPFPGWMEGNRMMDPI…
GB_D09G1419	GbFAR10	MGALFLNCFSVSPTAFNKGGSWRKKRRNCSSFVHCQGSSGKAIKTAGVSS VVKERSKMVNGGDRSAALMDAGSLIVSPNQADIAVKDLVPYGGSTTSLVE LQDGIGIVKFLRGKEFFITGSTGFLAKVLIEKILRTVPDVGKIFVLVKAK SKEAAMERLKTEIINAELFNCLQQTYGNSYQSFMLSKLVPVVGNVCESDL GLDDELADLISKEVDIIVNSAANTTFDERYDVAIDINTKGASHLMGFAKK CKKLKLFLQVSTAYVNGQRQGRVMEKPFDIGDCIARENLIAETTPRSIPE LDIEEEFVLARDTKEGCHESELAQKMKELGLQRARKYGWQDTYVFTKAMG EMMINNMRGEIPVVIIRPSVIESTCKEPFPGWMEGNRMMDPI…
Ga07G1182	GaFAR1	MELGSALQFLDNKSILVTGGTGFLAKIFVEKILRVQPNVKKLYLLVRAADHKSAIHRLHHEIVGKDLFRN LKKKCGTNFSSFISQKITVIPGDLTHQDLGLHDSDLLQLLCKELDVLLNLAATTNFDERYDVALGLNTLG AKYVVDFAKKCAKLQVLVHVSTAYVSGERSGLIVENSYRMGETLNGVSGLDVNIEKQVVEDQLHLLRLQG ASDKDITIAMKDLGIQRARRYGWPNTYVFTKAMGEMMVGELKDIIPAVIIRPTIVTSTYKEPFPGWVEGI RTIDSLAVGYAKGKLTFFLGDLEAIVDVIPADMVVNAIIVAMIAEARHQEPQTIYQVGSSIRNPLRYSNL QDYGFRYFTKNPWINKDGKPVIVSKVTVMNSMDSFQRYMAFRYL…
Ga08G0098	GaFAR2	MELGSALHFLDNKSILVTGAAGFLAKIFVEKILRVQPNVKKFYLLLRAADHKSAIHRLHNEAYLYIYIIG KDLFKVLKEKCGKNFSLFISEKITLIPGDISHEDLGIKDCTLVQEMLNEVDVVVNLAATTNFDERYDVAL GLNTFGAKFVANFAKKCVKLKVLVHVSTAYVSGEKTGLILENSYRMGETLNGVSGLDINFEKKIIEQKLN ELRLLGASDKDITQAMKDLGIQRARFYGWPNTYVFTKAMGEMLVGEFKANMATIILRPTIITSTFKEPFP GWAEGVRTIDSLAIGYAKGKLTFFLGDVDSVVDLIPADMVVNAIIIAMVAHASNQPSETIYQVGSSMRNP VKYHNLQDFGYRYFSKKPWINKDGKAVIVGKIRVMDSMASFHRY…
Ga09G1100	GaFAR3	MKEMIRENDERQNQDMDLDNVTKFLQGKTILVTGATGFLAKVFIEKILRLQLNVNKLYLLLRTSNDKFAT QRLKDEIISTELFRILRDKWGSKFDALISSKVIAVEGDISSENLGLEDSKLREELRKEIEIVVNSAATTS FNERYDVALGINTFGAFNVLNFGKKCDKIKLFLHISTAYVCGEKADMILEKRFYMGETLKGTHSINIFEE KRTMEEQLAQLEYHGAPDKAIKSSMKEFGLERAKLNGWPNTYVFTKAMGEMLLGHFKGDLPLVIIRPTMI ASTYKQPFPGWIEGVRTFDSFIVSYGKGKLTCFPANPNTIIDVIPVDMVVNAMVVAMKVHYAERQHACET IYHVSSSFRNPLTLSDLRNLFHCYFIRNPWIDANGLRVKVGQLT…
Ga09G1483	GaFAR4	MGALFLNCFSVPPTAFNKGGSGRKKRSNCSSFVHCQGSGGKAIKTAGVSSVVKERSKMVNGGDRSAALMD AGSLIVSPNQADIAVKDLVPYGGSTTSLVELQDGIGIVKFLRGKEFFITGSTGFLAKVLIEKILRTVPDV GKIFVLVKAKSKEAAMERLKTEIINAELFNCLQQTYGNSYQSFMLSKLVPVVGNVCESDLGLDDELANLI SKEVDIIVNSAANTTFDERYDVAMDINTKGASHLMGFAKKCKKLKLFLQVSTAYVNGQRQGRVMEKPFDI GDCIARENLIAETTPRSIPELDIEEEFGLARDTKEGCHERELAQKMKELGLQRARKYGWQDTYVFTKAMG EMMINNMRGEIPVVIIRPSVIESTCKEPFPGWMEGNRMMDPIVL…
Ga14G2584	GaFAR5	MELDNAVKFFQGKTILITGATGFLAKVFVEKILRIQPNVNKLYLLVRASNNKSAKQRLYDEIISKELFKI LRNNWGSKFDALISNKVKAVAGDISFENLGLNDSELREEMQKEIQIIVNVAASTDFSERYDDALDINTFG AFNVLNFGKKCDKVKLFLHISTAYVCGEEIGIILEKLKRRNDMNIFEEKRLAEEQLSQLQNQCIPDKAIT SSMKEFGLERAKLNGWPNTYVFTKAMGEMLLERFKGDLPLVIIRPTIIASTYKQPFPGWIEGVRTIDSVL VNYGKGKLTCFPGNLNSALDVIPVDMVVNVMVVAIEVHYAQHQYSCETIYHVGTSSKNPLKLSDLRNLSH YYFTKNPWIDTNGQKVEAGKLIVFSTINRFFLYMKIKYVLPLKV…
AT4G33790.1	ATFAR1	MSTEMEVVSVLKYLDNKSILVVGAAGFLANIFVEKILRVAPNVKKLYLLLRASKGKSATQ RFNDEILKKDLFKVLKEKYGPNLNQLTSEKITIVDGDICLEDLGLQDFDLAHEMIHQVDA IVNLAATTKFDERYDVALGINTLGALNVLNFAKRCAKVKILVHVSTAYVCGEKSGLIMET PYRMGETLNGTTGLDINYEKKLVQEKLDQLRVIGAAPETITETMKDLGLRRAKMYGWPNT YVFTKAMGEMMVGTKRENLSLVLLRPSIITSTFKEPFPGWTEGIRTIDSLAVGYGKGKLT CFLCDLDAVSDVMPADMVVNSILVSMAAQAGKQEEIIYHVGSSLRNPMKNSKFPELAYRY FSIKPWTNKEGKVVKVGAIEILSSMRSFHRYMT…
AT5G22500.1	ATFAR2	MESNCVQFLGNKTILITGAPGFLAKVLVEKILRLQPNVKKIYLLLRAPDEKSAMQRLRSE VMEIDLFKVLRNNLGEDNLNALMREKIVPVPGDISIDNLGLKDTDLIQRMWSEIDIIINI AATTNFDERYDIGLGINTFGALNVLNFAKKCVKGQLLLHVSTAYISGEQPGLLLEKPFKM GETLSGDRELDINIEHDLMKQKLKELQDCSDEEISQTMKDFGMARAKLHGWPNTYVFTKA MGEMLMGKYRENLPLVIIRPTMITSTIAEPFPGWIEGLKTLDSVIVAYGKGRLKCFLADS NSVFDLIPADMVVNAMVAAATAHSGDTGIQAIYHVGSSCKNPVTFGQLHDFTARYFAKRP LIGRNGSPIIVVKGTILSTMAQFSLYMTLRYKL…
AT3G44540.1	ATFAR3	MDSNCIQFLHDKTILVTGVPGFLAKVFVEKILRIQPKVKKLFLLLRAADNESAMQRFHSE VLEKDLFRVLKNALGDENLKAFITEKVVPIPGDISVDNLGVKGSDLLQHMWNEIDIIVNV AATTNFDERYDVGLSVNTFGPLNVLNFAKKCVKGQLLLHVSTAYVRGEKSGLLHEKTFHM GETLNGHRKLVIETEMELMKQKLKELQKQNCSEEEISQSMKDLGMSRAKLHGWPNTYVFT KSMGEMLLGNYRENLPIVIIRPTMITSTFSEPFPGWIEGLRTIDSVIVAYGKGRLKCFLA DPNSVLDLIPVDMVANAMVTAAAIHAGKLGSQTVYHVGSSCKNPITFEQIHDLAASYFTK NPLVRRDGSSILVSKGTILSTMAQFSFYMTLRY…
AT3G44550.1	ATFAR4	MELNCVQFLRNKTILVTGATGFLAKVFVEKILRVQPNVKKLYLLVRASDNEAATKRLRTE VFEKELFKVLRQNLGDEKLNTLLYEKVVSVPGDIATDQLGINDSHLRERMQKEIDIVVNV AATTNFDERYDVGLGINTFGALNVLNFAKKCVKVQLLLHVSTAYVCGEKPGLIPEKPFIM EEIRNENGLQLDINLERELMKQRLKELNEQDCSEEDITLSMKELGMERAKLHGWPNTYVF TKSMGEMLLGKHKENLPLVIIRPTMITSTLSEPFPGWIEGLRTVDSVIIAYGKGVLKCFL VDVNSVCDMIPVDMVANAMITAAAKHAGGSGVHMVYHVGSSHQNPVTFGEIHEIAVRYFT KNPLRSRNGSLITVSKVRFIPTMALFSLYMTLR…
AT3G44560.1	ATFAR5	MEFSCVHFLQNKTILVTGATGFLAKVFVEKILRVQPNVNKLYLVVRASDNEAATKRLRTE AFEKDLFKVLRDNLGDEKLNTLLSEKVVPVAGDIAMDHLGMKDSNLRERMQKEIDIVVNV AATTNFDERYDIGLGINTFGALNVLNFAKKCVKAQLLLHVSTAYVCGEKPGLLPEKPFVM EEICNENGLQLDINLERELMKQRLKELNEQGCSEEGTTFYMKELGMERAKLHGWPNTYVF TKSMGEMLLGNHKENLPLVIIRPTMITSTLFEPFPGWIEGLRTVDSVIIAYGKGVLKCFL VDVNSVCDMIPADMVANAMIAAAATHAGGSKVHMVYQVGSSHQNPIIYGEIREILFCYFT KNSLRSRNGSMITVSKMKLIPTLALFSLYMTIR…
AT3G11980.1	ATFAR6	MEALFLSSSSSSIVASNKLTRLHNHCVWSTVIRDKKRFGPTWCRVGGGGDGGRNSNAERP IRVSSLLKDRGQVLIREQSSPAMDAETLVLSPNGNGRTIEINGVKTLMPFSGASMVGMKE GLGIISFLQGKKFLITGSTGFLAKVLIEKVLRMAPDVSKIYLLIKAKSKEAAIERLKNEV LDAELFNTLKETHGASYMSFMLTKLIPVTGNICDSNIGLQADSAEEIAKEVDVIINSAAN TTFNERYDVALDINTRGPGNLMGFAKKCKKLKLFLQVSTAYVNGQRQGRIMEKPFSMGDC IATENFLEGNRKALDVDREMKLALEAARKGTQNQDEAQKMKDLGLERARSYGWQDTYVFT KAMGEMMINSTRGDVPVVIIRPSVIESTYKDPF…
AT5G22420.1	ATFAR7	MEPNCVQFLENRTILVTGASGFLAKVLVERILRLQPNVKRLYLLVRASDKKSAEQRYDVA LGINTFGAINVLNFAKKCVKPKLLLHVSTVYVCGERPGHIVEKHFAMGESLNGKNKVDIN TERRLADQKSKQFKEQGCSEEETEQAMKDFGLKRARLYGWPNTYVFTKAMGEMLLGHYRE TMPIVIIRPTIITSTFSDPFPGWIEGLKTVDSVIIFYGKGILKCFLVDQKTVCDIIPVDM VVNAMIAIAADHCHDSGSHTVYHVGSSNQNPVIYKQIYEMMSRYFMKSPLVGRNGMLIVP KVTRISTLARFRVYTNLRYKLPIQILGLLSVISLSQRDKFALHNRKFKMAMRLVKLYKPY VLFKGIFDDKNMETLRIKNEAKDMEKLFGTNPK…
AT3G56700.1	ATFAR8	MATTNVLATSHAFKLNGVSYFSSFPRKPNHYMPRRRLSHTTRRVQTSCFYGETSFEAVTS LVTPKTETSRNSDGIGIVRFLEGKSYLVTGATGFLAKVLIEKLLRESLEIGKIFLLMRSK DQESANKRLYDEIISSDLFKLLKQMHGSSYEAFMKRKLIPVIGDIEEDNLGIKSEIANMI SEEIDVIISCGGRTTFDDRYDSALSVNALGPAYVTGKREGTVLETPLCIGENITSDLNIK SELKLASEAVRKFRGREEIKKLKELGFERAQHYGWENSYTFTKAIGEAVIHSKRGNLPVV IIRPSIIESSYNEPFPGWIQGTRMADPIILAYAKGQISDFWADPQSLMDIIPVDMVANAA IAAMAKHGCGVPEFKVYNLTSSSHVNPMRAGKL…
Os08t0298700-01	OsFAR1	MISQMDSGNVVAFFRGRSILITGSTGFLGKVLVEKILRVQPDVKKLYLLVRANDVESATR RVQDEVTGKEIFQVLKEKHGDGFESFVEEKVCTLAGDIIYENLGLDSAKLTELSNEIDII VNGAATTNFYERYDVAFDSNVLGAKNICEFAKKCTKLKMLLHVSTAYVAGEQEGLILEKP FLMGQALREGRHLDITSELNLIKETRREMKASNRCSEKTEKRTMKELGLKRAKHFGWPNT YVFTKAMGEMLLGHLRGDLPVVIIRPSIITSILKEPLPGWMEGIRTIDSVIIGYAKQTLS FFLVDLNLIMDVIPGDMVVNAMMVAMAAHSGEQAQTIYHVTSSLSNPAPYAVLSDAGHRY FFANPPPRAGKNGRLRRMRFFSTVASFRAHMAI…
Os04t0354600-01	OsFAR2	METGGIAERFRDKTILITGATGFLGKLLVEKILRVQPEVRKLYLLVRAPDAIAAEERVLT EVVGKGLFDVLREQYGAGFNSFIKEKIYALPGDVMHENFGLESYEVLQLSQKVDIIVNGA ATTNFMERYDVALATNAAGVMHLCQFAKQCDNLKMVLHVSTAYVAGEQAGQLLEKPFQIG RALRLDYQLDIEAELQLVDSIKSELRIKCSSDDKLEKTTMRKLGLKRATHFGWPNTYVLT KAMGEMLLQQLGQDLPVVIVRPSMITSTFQEPMPGWIEETRTIDVIFVAYNDQTLPCFIF DGSVIFDLIPGDMVINAMMAAINSQWNKRAQVIYHVTSAHQNPLPVSLIEESMFRYFDIN PRTSKDGKAIKNKRPLAFKRLAYFQAYMILRYK…
Os04t0353600-01	OsFAR3	METGGIAERFRDKTILITGATGFLGKLLVEKILRVQPEVRKLYLLVRAPDAIAAEERVLT EVVGNGLFDVLREQYGAGFHSFIKEKIYALPGDVTHENFGLESYDILQLSQKVDIIVNGA ATTNFMERYDVALATNTTGVVHLCQFAKQCDNLKMVLHVSTAYVAGEQAGQIFEKPFQIG TALRLDYQLDIEAELQLVDKIKSELGINSDSKLEKITMRKLGLERAVHFGWPNTYTLTKA MGEMLLQQLGQDLPVVIVRPSMITSTFQEPMPGWIEQTRTIDVIFVAYNDQTLPCFIFDG SVIFDLIPGDMVINAMMAAINSQWNKQAQVIYHVTSSHQNPVPLSLIEESLYKYFHKNPR TSKDGKAIQNEKILTFNRLVYFQAYMILRYKVP…
Os09t0567500-02	OsFAR4	DVRKIYLPVRAVDAATAKQRMQTEVIGKELFGLLKEQHGKGFQSFIDEKVVPLAADMMHQ NLGLEESTLQELAKDLNIIVNGAATTNFYERYDVALDVNVMGVKYLCQLAKKCANLEVFL HVSTAYVCGERSGVVQERALREGETLREGTYLDIETELRLVGEQRQQLEDAGDAKAERKA MKDLGLARARHFGWPNTYVFTKAMGEMMLQEQLVAGAGRRHGIPVVIARPSIITSVHRDP LPGWIEGTRTIDAIIIGYAKQSLSCFLADLDLIMDVVPGDLVVNAMMAAMVAHSRGSSSE MAVYHVTSSMRHPAAYAVLYRTGWRYFLENPRVGKDGVAVRTRPVYFFRTIASFRAFMAV AYALPLQLLRLLSLLCFGLLFARRYADLSRKYS…
Os08t0557800-01	OsFAR5	MMASDRLDAERIIEYFKGKSILITGATGFLGKILVEKILRVQPDVKKIYLLVRAIDQASA NQRVQSEVTETELFSVVKEKHGKGFSRFIEEKVVALAGDIIYDDLGLDPPLLQHLADNLD VIVNGAATTNFYGRYDVSLDVNVLGVKHLCQLAKKCRGLKVFLHVSTAYAGGEQEGLIQE RAFEEGWALREGMHLDVDAELRLVADVRREVEDDDDKARRKAMKELGLARARHFGWSNTY VFTKAMGEMVLSRMLLQSSSPAPAITGAGGVVVVRPSIITSIQRDPVPGWMQGTRTIDTL IIGYAKQNLSCFLGDLDLVMDVIPGDMVVNAMMAAAVAHSGEAGQERPAVYHVSSSLRNP AAYSVLYEAGRRHFTEKPRVGKRGEVIPTKEMH…
Os03t0167600-01	OsFAR6	MGMSSCVNLSRVAAAAAGRRPGFAGELGGRRGHGRSVLPVVAALPVRRKGSGCGVACCVS SSSSSSVHGKNSAAAAEGHAGGIGIAEFLGGKNFLITGGTGFLAKVLIEKILRTNPDVGK IYVLIKAKDGDAALKRLHNEVVDTELFSRLQEIHGKDYHSFAARKLVPVVGDVREANVGI APELAGVIADEVDIIVNSAANTTFDERYDVAMDINTVGPFRIMSFAQRFRRLKLFLQVST AYVNGQRQGVVLEKPFRLGDTIAKELGSPDSSQHKNTMLDIEAEIKLAFDHRRHGDDSAS FSEEMKELGLERAKLHGWQDTYVFTKAMGEMVINSMRGDIPVVTIRPSVIESTWRDPFPG WMEGNRMMDPVVLYYGKGQLSGFLADPEGVLDV…
Os04t0354400-00	OsFAR7	SKLQDDNSYFLVFGLRVVVPYILERREYLWTYFKILYRYYLSWVFLFIIRNCIYHACLYI YVLVEKILRVQPEVRKLYQLVRAPDAAAAEERVLTEVVGKGLFDVLRKQHGAAFYSFIKK KICPLAGDVMHENFGLGSSEILRLSHEVDIIVNGAATTNFMDRYDVALATNTEGVMHLCH SAKQCDNLKMLLHVSTAYVAGEQAGLLLEKPFQIGEALRQGYTLDVEAEVQLVDRIKSKL RIKSSIHNKLEKTTMKKLGLKRAMHFGWPNTYVLTKAMGEMLLRQLGGDLPVVIVRPSII TSTFQDPMPGWIEETRTIDAIFVAYNDQTLPCFIFDGSVIFDLIPGDMVISAMMAAINSH WNKQAQVIYHVTSAHQNPIQLSLIEESMYKYFH…
Os07t0489100-00	OsFAR8	MDAATVAGYFKDKSILITGSTGFLGKIFVEKILRIQPDVKKIFLLVRAADTSSAEQRVLN EVIGNELFGPLRENYGSNFYSFMKEKISPLAGDIINENLGLESLEILKLSKEIDIIVNGA ATTNFYERYDVSLASNVLGAKYVCKFAKKCANLKMFLHISTAFVSGEQEGLLLEKVFQIG ETLKEGCHLDIAAELQLVESVKAELTHSTNGKSEQTEKITMKKLGLKRARQFGWPNTYVF TKAMGEMLVGHFGRELPVVIIRPSIVSSIYHDPLPGWIEGTRTIDSIISAYAKQTIPHFI GAGHVILDVTATTQDQSKEACVLNFDPKSIDWEYYLYNSHIPGVMKYAHKK
Os04t0355500-00	OsFAR9	MEPGSIAERFRDRSILITGSTGFLAKMLVEKILRIQPDVRKLYLLVRAPDAAAAKERLLT EVVGKGLFDVLREQHGASFHSFIKEKVCPLPGDITHQNFGLGNSEILRLSQDVDIIVNGA ATTNFMERYDVALVTNTAAVIHLCQFAKQSDNLKMLLHVSTAMNCCLNSFYAKP
Os07t0416600-00	OsFAR10	MELAGVAERFHSRTVLITGATGFIAKLLVEKILRLQPGVKRLYLLVRAADQVSANRRVES ETQSKEGFAPSRFGFMHGISTAVAGIR

## Sheet: Table S3
Table S3 The primers used in this study.
Primer name	Sequences (5'-3')	Destination
qGhFAR1-F	CCCATCAAGATTTGGGTCTCCA	RT-qPCR
qGhFAR1-R	TCAAAGTTGGTTGTTGCAGCAA
qGhFAR2-F	CCCATCAAGATTTGGGTCTCCA	RT-qPCR
qGhFAR2-R	GCTCCCAATGTGTTGAGGTCTA
qGhFAR3-F	GGGCATTCAAAGGGCAAGATTT	RT-qPCR
qGhFAR3-R	TCCACATCACCGAGGAAGAAAG
qGhFAR4-F	GGGCATTCAAAGGGCAAGATTT	RT-qPCR
qGhFAR4-R	TCCACATCACCGAGGAAGAAAG
qGhFAR6-F	AACTGCTTATGTAGGCGGTGAA	RT-qPCR
qGhFAR6-R	TACGTATTTGGCCACCCATTCA
qGhFAR7-F	AGATGCTATGCACCAAACTGGA	RT-qPCR
qGhFAR7-R	CCAAGTACTTTGCTTGCTCCAC
qGhFAR9-F	TTGGGCATCAATACATTTGGCG	RT-qPCR
qGhFAR9-R	AACGTAAGCGGTTGAAATGTGG
qGhFAR10-F	CAAGCTTTCCCTGGTTGGATTG	RT-qPCR
qGhFAR10-R	CAAGCTTTCCCTGGTTGGATTG
GhUBQ7F	GAAGGCATTCCACCTGACCAAC	RT-qPCR
GhUBQ7R	CTTGACCTTCTTCTTCTTGTGCTTG
Ve-ITS1-F	AAAGTTTTAATGGTTCGCTAAGA	qPCR
ST-VE1-R	CTTGGTCATTTAGAGGAAGTAA
VGhCHLIF	CGGAATTCTTCGGTGACCCTTATAAC	VIGS
VGhCHLIR	GGGGTACCATCAAACCGTGCTCTTTC
VGhFAR1F	CCGAATTCTGCCAATACCGACCTTGCTT	VIGS
VGhFAR1R	GCGGTACCCGCTGTACGTAGCAACCTGA
