# Supplementary material for: Genome‑wide Characterization of the cotton FAR gene family reveals a positive role of GhFAR3 in Verticillium dahliae resistance
Source: Research Square preprint supplement (doi:10.21203/rs.3.rs-5718880/v1), 2025-01-02
Supplement: Supplementary file 2 [file e964541d645f2c8b5387aa63.docx]

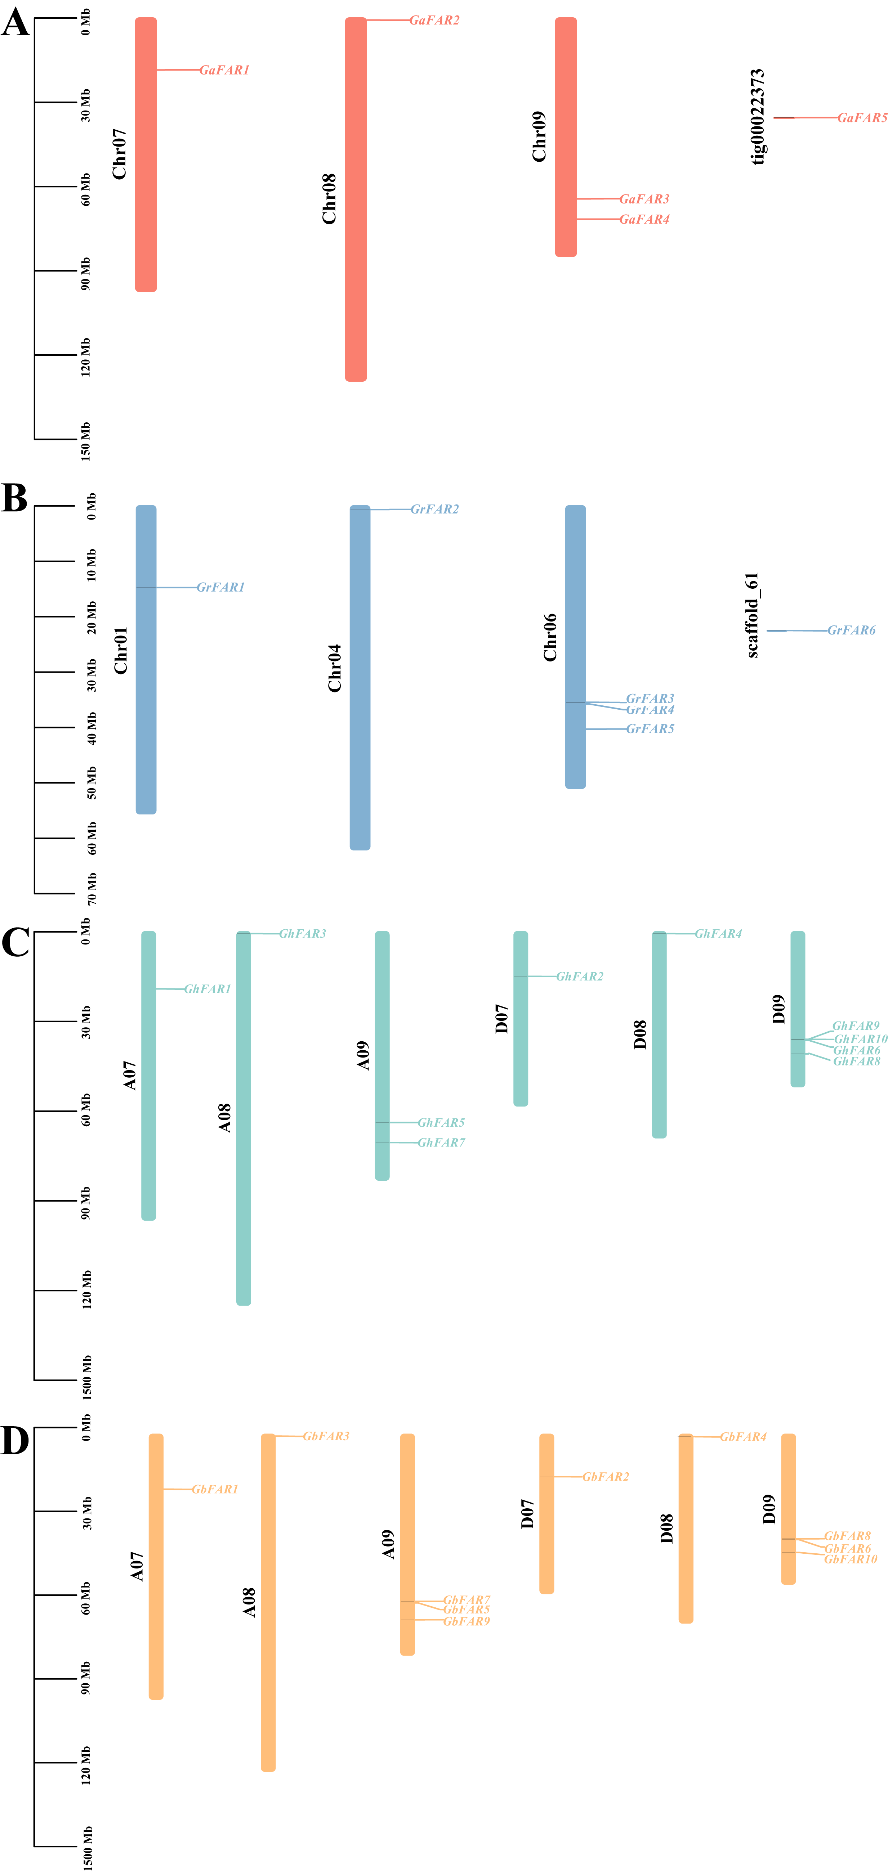


**Figure S1.** Chromosomal location distribution of *FAR* genes in four *Gossypium* species. (A) *G. arboreum*, (B) *G. raimondii*, (C) *G. hirsutum*, (D) *G.barbadense*.


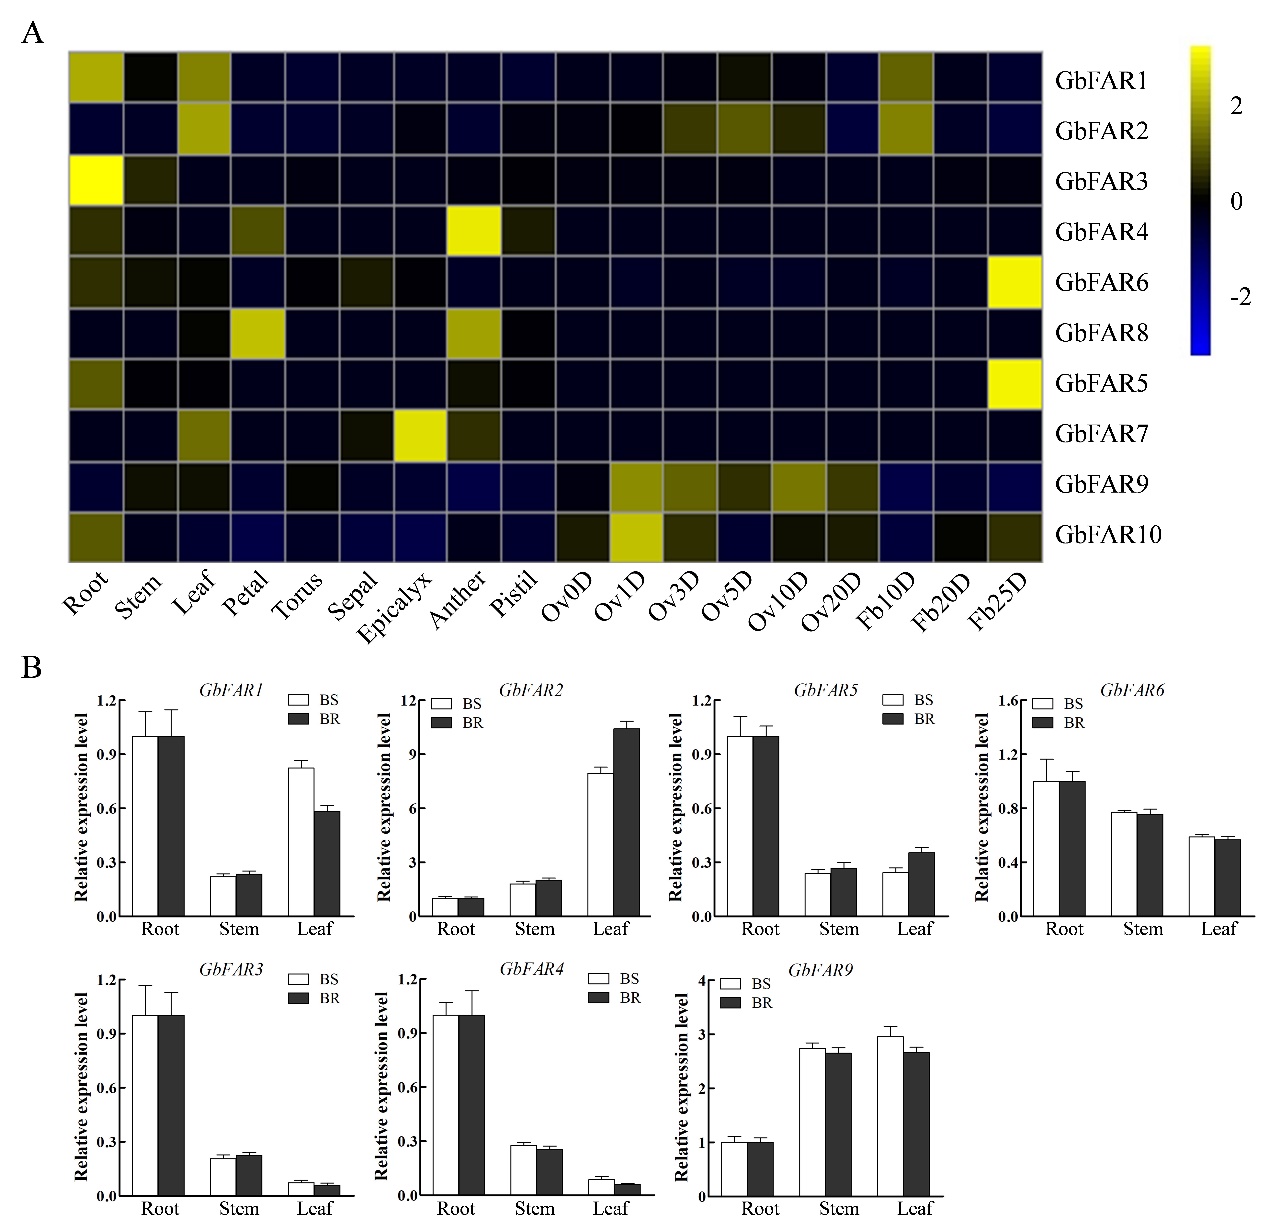


**Figure S2.** Expression analysis of *FAR* genes in different tissues of *Gossypium barbadense*. (A) Transcriptomic data for *GbFAR* genes in various tissues. (B) qRT-PCR validation of *GbFAR* genes in roots, stems, and leaves. Data are shown as mean ± SD of three biological replicates (** *P* < 0.01; t-test).


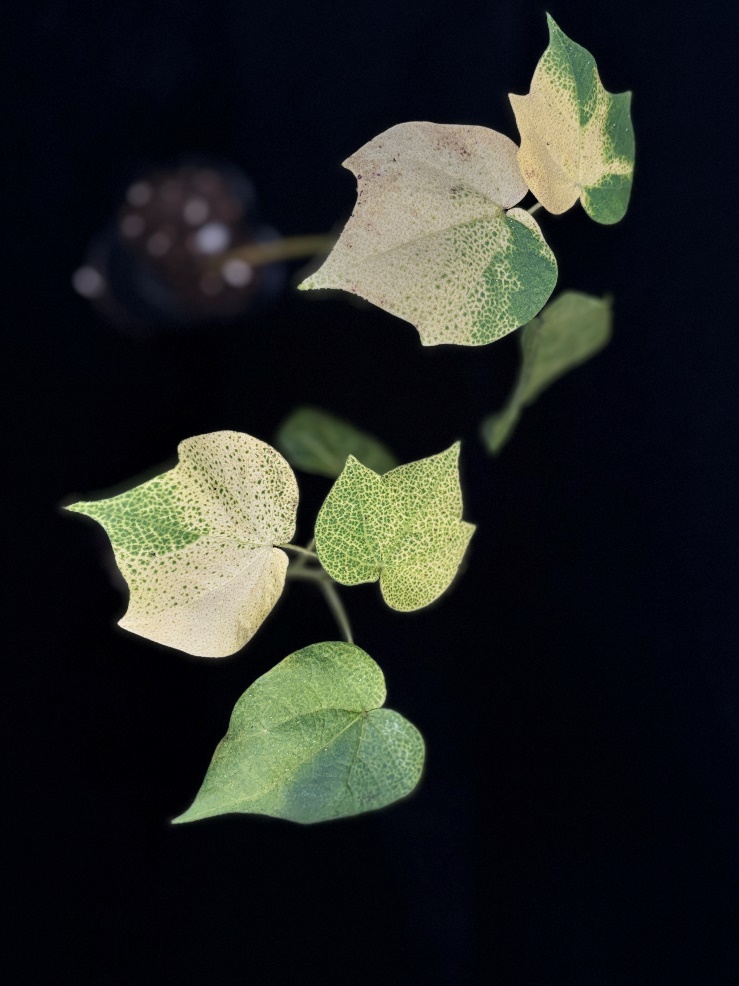


**Figure S3**. The albino phenotype of TRV: *GhCHLI*.
